# Supplementary material for: Bioinformatic Analysis Reveals an Immune/Inflammatory-Related Risk Signature for Oral Cavity Squamous Cell Carcinoma
Source: Hindawi journal article supplement (doi:10.1155/2019/3865279), 2019-12-13
Supplement: f1 [file 3865279.f1.pdf]

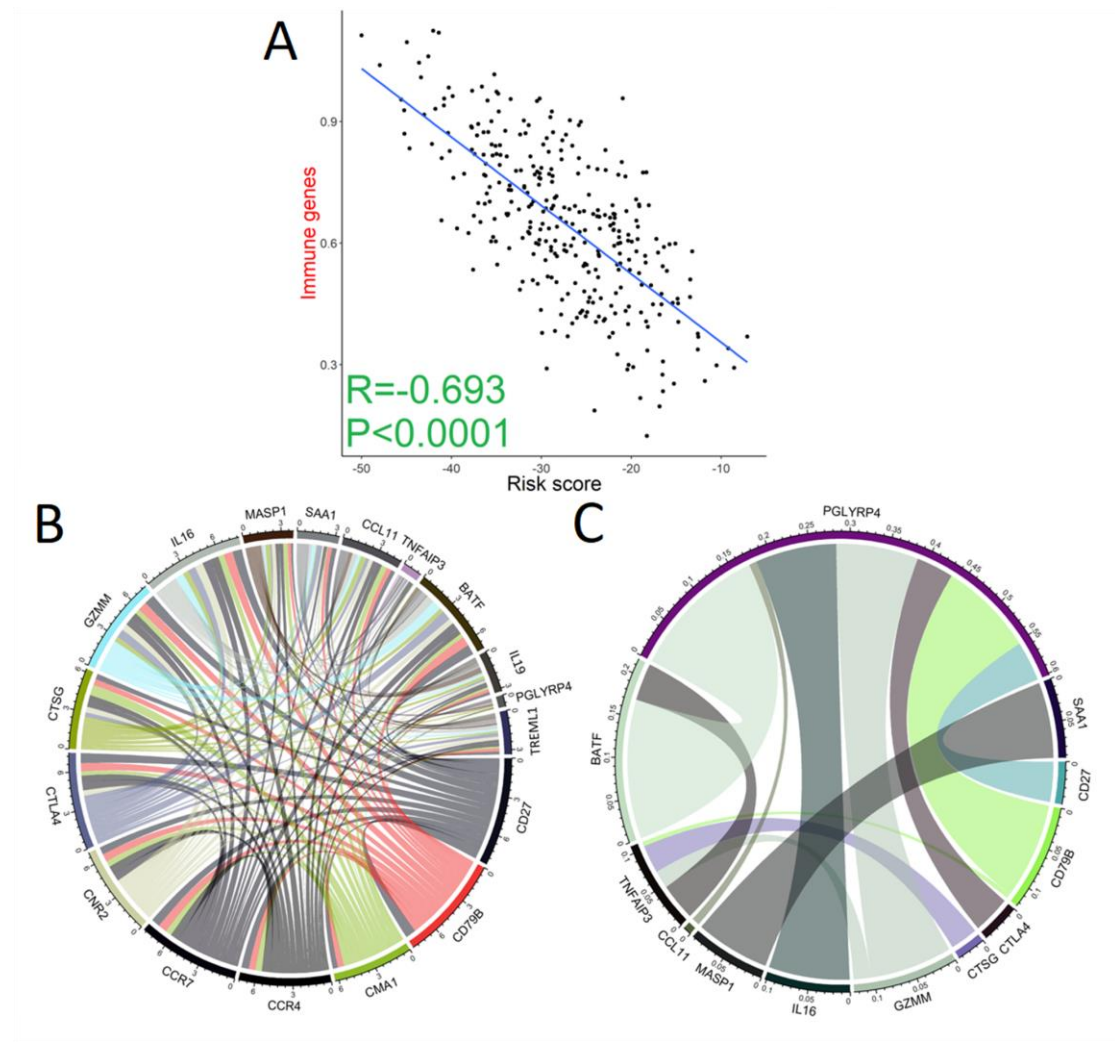

**Fig. S1 Association between the risk score and the immune genes and association among genes in the signature.**

**(A)** Association between the risk score and the immune genes in the training cohort. **(B)** Positive correlation among genes in the signature. Stripe width indicated the  $r$  value. **(C)** Negative correlation among genes in the signature. Stripe width indicated the  $r$  value.

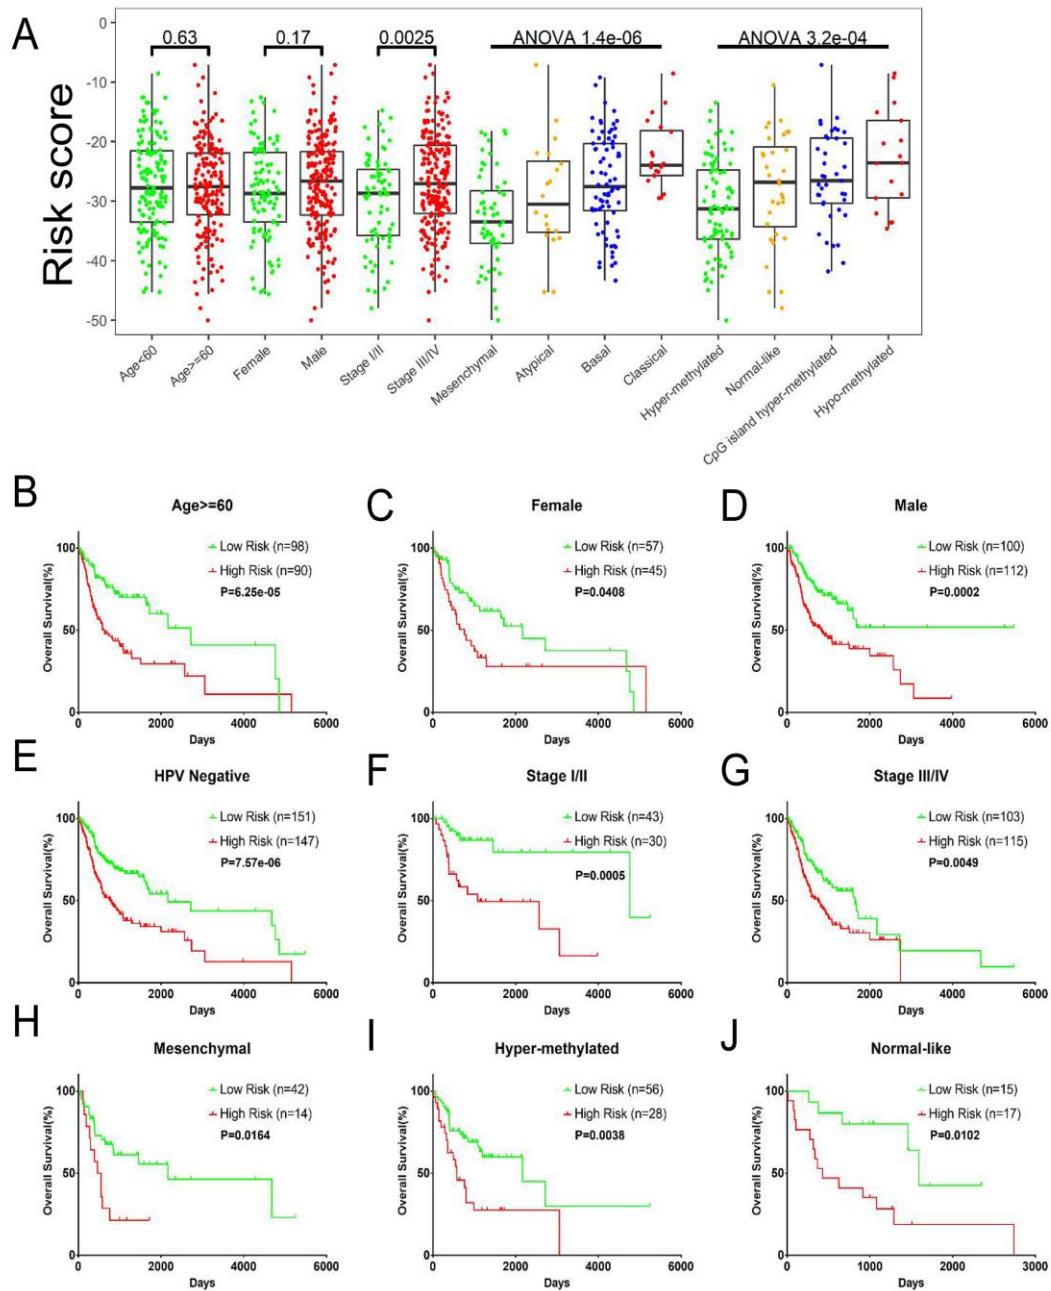

**Fig. S2 Distribution and prognostic value of the risk score across different subgroups of the training cohort.**

**(A)** Distribution of the risk score among subgroups of OC-SCC in the training cohort. **(B-J)** Kaplan–Meier survival analyses based on the dichotomized risk score defined by clinicopathologic factors of the training cohort.

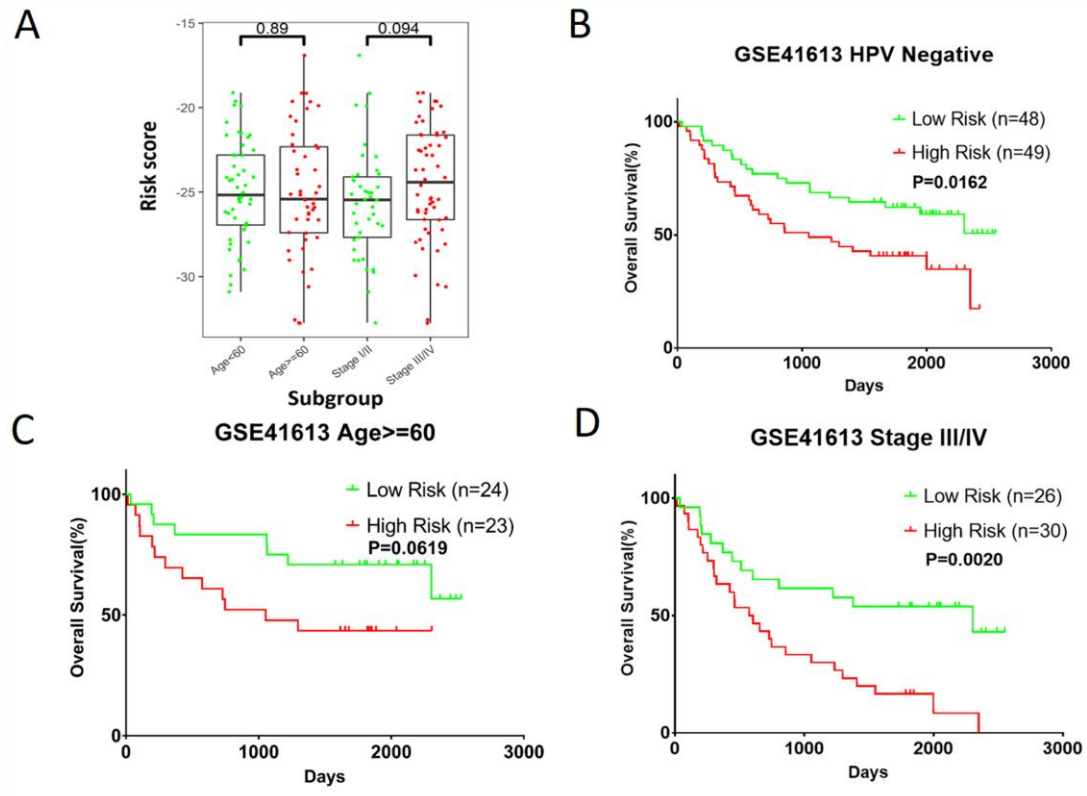

**Fig. S3 Distribution and prognostic value of the risk score across different subgroups of the validation cohort.**

**(A)** Distribution of the risk score among subgroups of OC-SCC in the validation cohort. **(B-D)** Kaplan–Meier survival analyses based on the dichotomized risk score defined by clinicopathologic factors of the validation cohort.

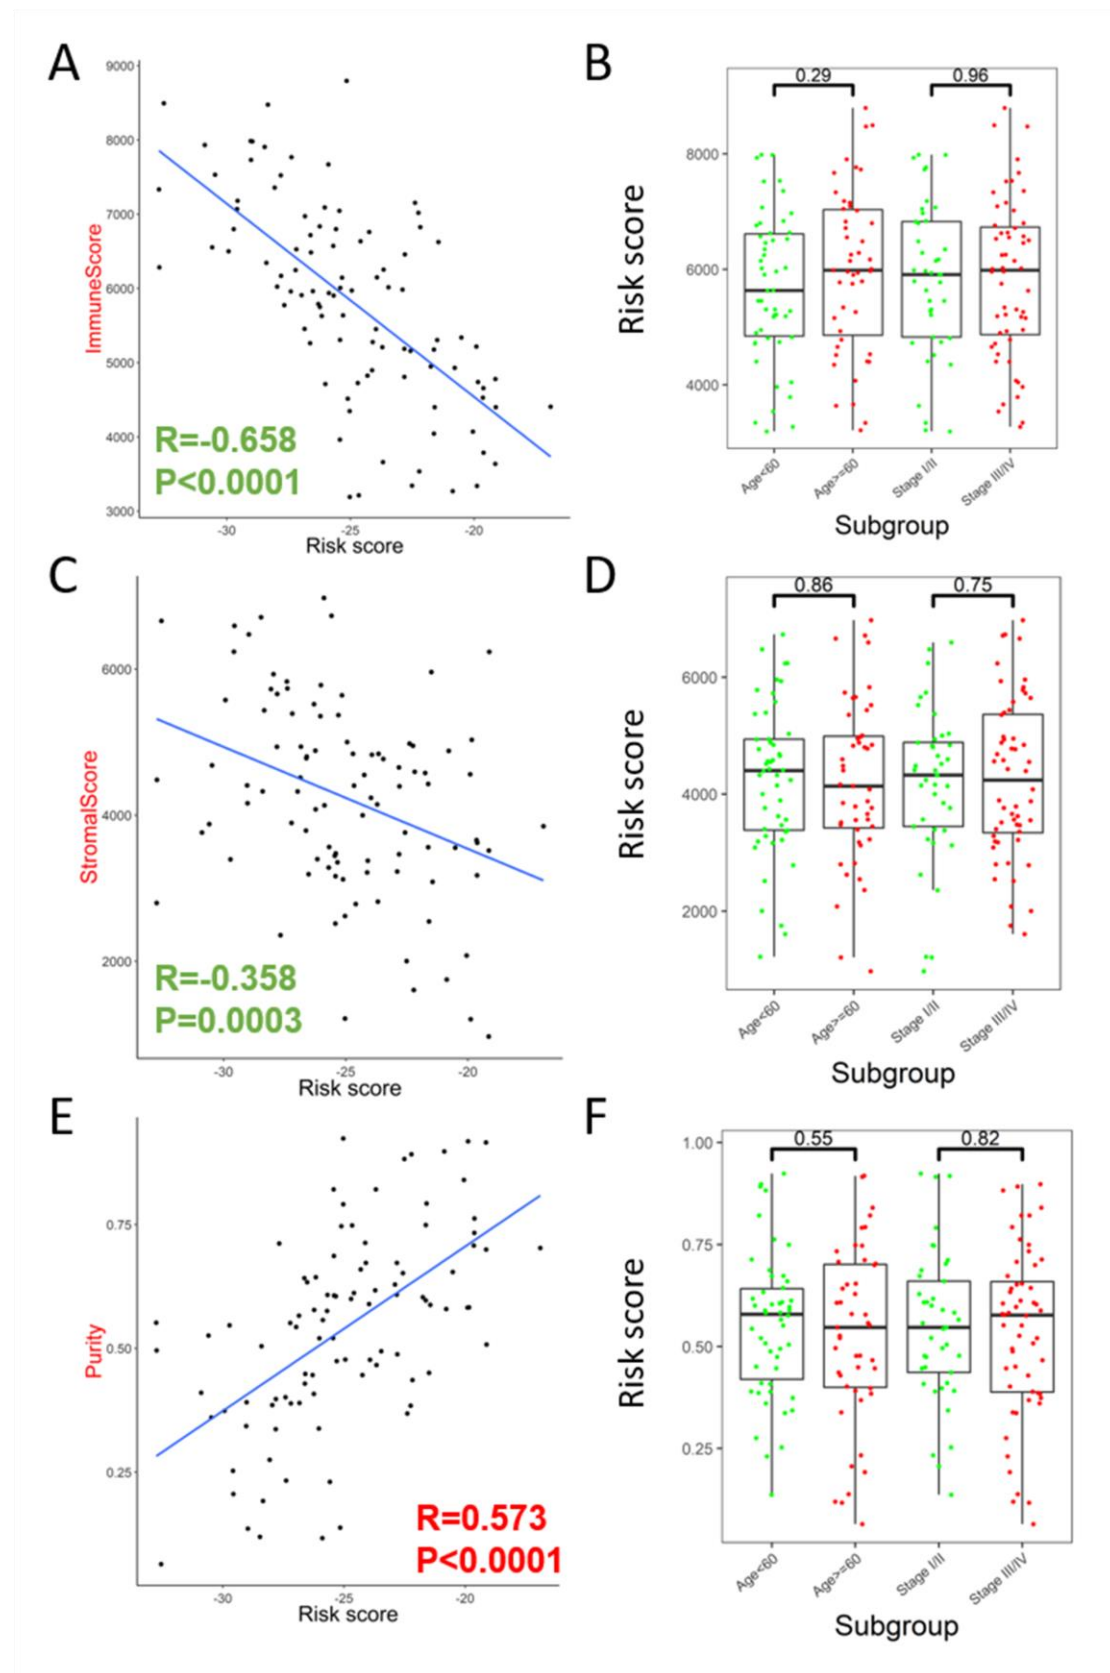

**Fig. S4 Association between the risk score and tumor purity in the validation cohort.**

**(A, B)** Correlation of ImmnueScore and the risk score and the distribution of the ImmnueScore among subgroups of OC-SCC in the validation cohort. **(C, D)** Correlation of StromaScore and the risk score and the distribution of the StromaScore among subgroups of OC-SCC in the validation cohort. **(E, F)** Correlation of tumor purity and the risk score and the distribution of tumor purity among subgroups of OC-SCC in the validation cohort.

**Table S1.** Demographic characteristics in the training cohort and validation cohort.

| Patient characteristics     | Training cohort (n=314) | Validation cohort (n=97) | P value |
|-----------------------------|-------------------------|--------------------------|---------|
| Age (year)                  |                         |                          | 0.1911  |
| <60                         | 136                     | 50                       |         |
| ≥60                         | 178                     | 47                       |         |
| Gender                      |                         |                          | 1.0000  |
| Male                        | 212                     | 66                       |         |
| Female                      | 102                     | 31                       |         |
| Stage                       |                         |                          | 0.0020  |
| I/II                        | 73                      | 41                       |         |
| III/IV                      | 218                     | 56                       |         |
| Disease site                |                         |                          |         |
| OSCC                        | 314                     | 97                       |         |
| Alveolar Ridge              | 18                      |                          |         |
| Buccal Mucosa               | 22                      |                          |         |
| Floor of mouth              | 62                      |                          |         |
| Hard Palate                 | 7                       |                          |         |
| Lip                         | 3                       |                          |         |
| Oral Cavity                 | 73                      |                          |         |
| Oral Tongue                 | 129                     |                          |         |
| HPV status                  |                         |                          | 0.0877  |
| HPV16 positive              | 12                      | 0                        |         |
| HPV33 positive              | 4                       | 0                        |         |
| HPV negative                | 298                     | 97                       |         |
| RNA subtype                 |                         |                          |         |
| Atypical                    | 20                      |                          |         |
| Basal                       | 76                      |                          |         |
| Classical                   | 20                      |                          |         |
| Mesenchymal                 | 56                      |                          |         |
| Methylation subtype         |                         |                          |         |
| CpG island hyper-methylated | 39                      |                          |         |
| Hyper-methylated            | 84                      |                          |         |
| Hypo-methylated             | 17                      |                          |         |
| Normal-like                 | 32                      |                          |         |

P value was calculated by Pearson chi-squared test or Fisher exact test depending on patient counts in each subgroup.

**Table S2.** Risk score formula.

| Gene    | Univariate Cox Regression |         |
|---------|---------------------------|---------|
|         | Beta                      | P Value |
| CD27    | -0.444                    | 0.009   |
| CD79B   | -0.439                    | 0.009   |
| CMA1    | -0.510                    | 0.003   |
| CCR4    | -0.473                    | 0.005   |
| CCR7    | -0.437                    | 0.009   |
| CNR2    | -0.557                    | 0.001   |
| CTLA4   | -0.467                    | 0.006   |
| CTSG    | -0.675                    | <0.001  |
| GZMM    | -0.518                    | 0.002   |
| IL16    | -0.519                    | 0.002   |
| MASP1   | -0.498                    | 0.004   |
| SAA1    | 0.475                     | 0.005   |
| CCL11   | -0.466                    | 0.006   |
| TNFAIP3 | 0.442                     | 0.009   |
| BATF    | -0.451                    | 0.008   |
| IL19    | -0.470                    | 0.006   |
| PGLYRP4 | -0.439                    | 0.009   |
| TREML1  | -0.494                    | 0.004   |

Risk score = (-0.444 × CD27 expression) + (-0.439 × CD79B expression) + (-0.510 × CMA expression) + (-0.473 × CCR4 expression) + (-0.437 × CCR7 expression) + (-0.557 × CNR2 expression) + (-0.467 × CTLA4 expression) + (-0.675 × CTSG expression) + (-0.518 × GZMM expression) + (-0.519 × IL16 expression) + (-0.498 × MASP expression) + (0.475 × SAA1 expression) + (-0.466 × CCL11 expression) + (0.442 × TNFAIP3 expression) + (-0.451 × BATF expression) + (-0.470 × IL19 expression) + (-0.439 × PGLYRP4 expression) + (-0.494 × TREML1 expression)
